# Supplementary material
Source: Research Square preprint supplement (doi:10.21203/rs.3.rs-9944383/v1)
Supplement: Supplementary file 1 [file 199af43c02f94c2482f39e4e.docx]

Supplementary Appendix 2. All HRs with 95% CIs in multivariable Cox regression model for NDD

| Variable | | HR (95% CI) | *P*-value |
| --- | --- | --- | --- |
| Mother age, y | | 0.97 (0.97, 0.97) | <0.001 |
| Household income level | |  |  |
|  | Medical aid program | 1.97 (1.88, 2.06) | <0.001 |
|  | Q1 (lowest) | 1 |  |
|  | Q2 | 0.97 (0.95, 0.98) | <0.001 |
|  | Q3 | 0.90 (0.89, 0.91) | <0.001 |
|  | Q4 (highest) | 0.96 (0.94, 0.97) | <0.001 |
|  | Unknown | 0.93 (0.90, 0.95) | <0.001 |
| Residence | |  |  |
|  | Metropolitan area | 1 |  |
|  | Non-metropolitan area | 0.81 (0.80, 0.82) | <0.001 |
| Maternal History | |  |  |
|  | Psychotic disorders | 1.38 (1.30, 1.47) | <0.001 |
|  | Bipolar disorders | 1.29 (1.21, 1.38) | <0.001 |
|  | Depressive disorders | 1.63 (1.60, 1.65) | <0.001 |
|  | Chronic hypertension | 1.08 (1.06, 1.11) | <0.001 |
|  | Pre-gestational diabetes mellitus | 1.19 (1.17, 1.20) | <0.001 |
|  | Neuropsychiatric conditions | 1.24 (1.06, 1.46) | 0.008 |
| Pregnancy/Birth | |  |  |
|  | Hypertensive disorders of pregnancy | 1.10 (1.07, 1.12) | <0.001 |
|  | Pre-eclampsia or eclampsia | 1.00 (0.92, 0.99) | 0.022 |
|  | Gestational diabetes mellitus | 1.16 (1.14, 1.19) | <0.001 |
|  | Cesarean delivery | 1.06 (1.05, 1.07) | <0.001 |
|  | Birth asphyxia | 1.17 (1.09, 1.24) | <0.001 |
|  | Adverse birth events | 1.20 (1.17, 1.24) | <0.001 |
| Neonatal factors | |  |  |
|  | Female sex | 0.52 (0.51, 0.52) | <0.001 |
|  | Low birth weight or preterm | 1.48 (1.39, 1.58) | <0.001 |
|  | Bacterial sepsis | 1.13 (1.09, 1.16) | <0.001 |
|  | Necrotizing enterocolitis | 0.98 (0.86, 1.12) | 0.759 |
|  | Fetal malnutrition | 1.23 (1.19, 1.27) | <0.001 |
|  | Mechanical ventilation during NICU stay | 1.20 (1.15, 1.26) | <0.001 |
|  | Congenital circulatory malformations | 1.22 (1.19, 1.26) | <0.001 |
|  | Congenital GI malformations | 1.25 (1.22, 1.28) | <0.001 |
|  | Disorders of bilirubin metabolism | 1.19 (1.07, 1.33) | 0.001 |
|  | Lipoprotein metabolism disorders | 1.22 (1.14, 1.30) | <0.001 |
|  | Other metabolic disorders | 1.01 (0.90, 1.13) | 0.873 |
| Pediatric CCC | |  |  |
|  | 0 | 1 |  |
|  | 1 | 0.99 (0.97, 0.99) | 0.013 |
|  | ≥ 2 | 1.14 (1.07, 1.22) | <0.001 |

NDD, neurodevelopmental disorder; HR, hazard ratio; CI, confidence interval; CCC, complex chronic conditions; GI, gastrointestinal; NICU, neonatal intensive care unit; TPN, total parenteral nutrition.
