# Supplementary material
Source: Research Square preprint supplement (doi:10.21203/rs.3.rs-9944383/v1)
Supplement: Supplementary file 2 [file 30acd29a3ec335d2d9298c66.docx]

Table 3. Uni- and Multivariable Cox regression analyses for NDD in entire cohort

| Outcome | | | Univariable analyses | *P*-value | Multivariable analyses | *P*-value |
| --- | --- | --- | --- | --- | --- | --- |
| HR (95% CI) | HR (95% CI) |
| NDD | | |  |  |  |  |
|  | TPN group (vs control group) | | 2.69 (2.52, 2.88) | <0.001 | 1.17 (1.08, 1.26) | <0.001 |
|  | TPN, day | | 1.72 (1.66, 1.78) | <0.001 | 1.12 (1.07, 1.18) | <0.001 |
|  | TPN 1-2 days (vs control group) | | 2.65 (2.48, 2.84) | <0.001 | 1.16 (1.08, 1.25) | <0.001 |
|  | TPN ≥ 3 days (vs control group) | | 3.94 (2.90, 5.35) | <0.001 | 1.37 (1.01, 1.87) | 0.046 |
| Intellectual disability | | |  |  |  |  |
|  | TPN group (vs control group) | | 6.03 (5.30, 6.86) | <0.001 | 1.33 (1.15, 1.54) | <0.001 |
|  | TPN, day | | 2.12 (2.02, 2.23) | <0.001 | 1.19 (1.10, 1.30) | <0.001 |
|  | TPN 1-2 days (vs control group) | | 5.80 (5.08, 6.63) | <0.001 | 1.30 (1.12, 1.51) | 0.001 |
|  | TPN ≥ 3 days (vs control group) | | 12.90 (7.90, 21.06) | <0.001 | 1.98 (1.20, 3.28) | 0.007 |
| Psychological development disorder | | |  |  |  |  |
|  | TPN group (vs control group) | | 4.93 (4.48, 5.41) | <0.001 | 1.29 (1.16, 1.44) | <0.001 |
|  | TPN, day | | 2.02 (1.95, 2.10) | <0.001 | 1.20 (1.13, 1.28) | <0.001 |
|  | TPN 1-2 days (vs control group) | | 4.79 (4.34, 5.28) | <0.001 | 1.27 (1.14, 1.42) | <0.001 |
|  | TPN ≥ 3 days (vs control group) | | 9.18 (6.25, 13.48) | <0.001 | 1.73 (1.17, 2.57) | 0.006 |
| Behavioral and emotional disorders | | |  |  |  |  |
|  | | TPN group (vs control group) | 2.03 (1.87, 2.21) | <0.001 | 1.06 (0.96, 1.16) | 0.244 |
|  | | TPN, day | 1.51 (1.44, 1.59) | <0.001 | 1.03 (0.97, 1.10) | 0.357 |
|  | | TPN 1-2 days (vs control group) | 2.02 (1.86, 2.20) | <0.001 | 1.06 (0.96, 1.16) | 0.239 |
|  | | TPN ≥ 3 days (vs control group) | 2.30 (1.48, 3.56) | <0.001 | 1.02 (0.65, 1.58) | 0.942 |
| Attention-deficit/hyperactivity disorder | | |  |  |  |  |
|  | | TPN group (vs control group) | 2.33 (2.12, 2.56) | <0.001 | 1.10 (0.99, 1.23) | 0.059 |
|  | | TPN, day | 1.60 (1.51, 1.69) | <0.001 | 1.05 (0.97, 1.13) | 0.222 |
|  | | TPN 1-2 days (vs control group) | 2.32 (2.11, 2.56) | <0.001 | 1.11 (0.99, 1.23) | 0.052 |
|  | | TPN ≥ 3 days (vs control group) | 2.52 (1.52, 4.18) | <0.001 | 0.94 (0.59, 1.63) | 0.938 |
| Autism Spectrum Disorder | | |  |  |  |  |
|  | | TPN group (vs control group) | 4.44 (3.76, 5.25) | <0.001 | 1.14 (0.95, 1.38) | 0.167 |
|  | | TPN, day | 1.99 (1.86, 2.13) | <0.001 | 1.16 (1.03, 1.30) | 0.011 |
|  | | TPN 1-2 days (vs control group) | 4.32 (3.64, 5.14) | <0.001 | 1.13 (0.93, 1.37) | 0.220 |
|  | | TPN ≥ 3 days (vs control group) | 8.04 (4.02, 16.07) | <0.001 | 1.48 (0.73, 3.00) | 0.274 |
| Tic disorder | | |  |  |  |  |
|  | | TPN group (vs control group) | 1.66 (1.40, 1.96) | <0.001 | 0.99 (0.83, 1.20) | 0.964 |
|  | | TPN, day | 1.37 (1.23, 1.53) | <0.001 | 1.00 (0.87, 1.14) | 0.950 |
|  | | TPN 1-2 days (vs control group) | 1.65 (1.39, 1.96) | <0.001 | 1.00 (0.83, 1.20) | 0.958 |
|  | | TPN ≥ 3 days (vs control group) | 1.92 (0.80, 4.62) | 0.144 | 1.02 (0.42, 2.46) | 0.969 |
| Mood disorder | | |  |  |  |  |
|  | | TPN group (vs control group) | 1.67 (1.51, 1.85) | <0.001 | 0.98 (0.88, 1.09) | 0.678 |
|  | | TPN, day | 1.38 (1.30, 1.48) | <0.001 | 0.98 (0.91, 1.06) | 0.631 |
|  | | TPN 1-2 days (vs control group) | 1.68 (1.52, 1.86) | <0.001 | 0.99 (0.89, 1.10) | 0.813 |
|  | | TPN ≥ 3 days (vs control group) | 1.36 (0.73, 2.53) | 0.332 | 0.70 (0.38, 1.31) | 0.265 |
| Neurotic, stress-related and somatoform disorders | | |  |  |  |  |
|  | | TPN group (vs control group) | 1.64 (1.52, 1.79) | <0.001 | 1.01 (0.93, 1.11) | 0.773 |
|  | | TPN, day | 1.36 (1.29, 1.44) | <0.001 | 1.00 (0.93, 1.06) | 0.887 |
|  | | TPN 1-2 days (vs control group) | 1.65 (1.52, 1.79) | <0.001 | 1.02 (0.93, 1.11) | 0.679 |
|  | | TPN ≥ 3 days (vs control group) | 1.50 (0.93, 2.41) | 0.096 | 0.84 (0.52, 1.35) | 0.465 |

NDD, neurodevelopmental disorder; HR, hazard ratio; CI, confidence interval; TPN, total parenteral nutrition
