# Supplementary material
Source: Research Square preprint supplement (doi:10.21203/rs.3.rs-9944383/v1)
Supplement: Supplementary file 3 [file 336deaf623bf7bc6b443decd.docx]

Supplementary Appendix 1.Detailed Definitions and ICD-10 Codes for Study Variables

**Maternal Sociodemographic Covariates**

- **Maternal Age**: The age of the mother in years at the time of the infant's birth.
- **Household Income Level**: Categorized into quintiles based on National Health Insurance premium contributions: Q1 (lowest), Q2, Q3, and Q4 (highest). Separate categories were included for the Medical Aid program (government-subsidized healthcare for the lowest-income bracket) and unknown status.
- **Residence**: Classified by administrative district into Metropolitan area (including major urban centers) or Non-metropolitan area.

**Maternal Medical and Psychiatric History**

- **Psychotic disorders**: ICD-10 codes F20–F29.
- **Bipolar disorders**: ICD-10 codes F30–F31.
- **Depressive disorders**: ICD-10 codes F32–F33.
- **Chronic hypertension**: Pre-existing hypertension before pregnancy, ICD-10 codes I10–I15.
- **Pre-gestational diabetes mellitus**: Type 1 or Type 2 diabetes diagnosed prior to pregnancy, ICD-10 codes E10–E14.
- **Neuropsychiatric conditions**: Mental disorders and diseases of the nervous system complicating pregnancy, ICD-10 code O99.3.

**Pregnancy and Birth-related Covariates**

- **Hypertensive disorders of pregnancy**: Various forms of high blood pressure during pregnancy, ICD-10 codes O10–O16.
- **Pre-eclampsia or eclampsia**: ICD-10 codes O14–O15.
- **Gestational diabetes mellitus**: Glucose intolerance with onset during pregnancy, ICD-10 code O24.
- **Cesarean delivery**: Identified via National Health Insurance procedure codes for C-section.
- **Birth asphyxia**: ICD-10 code P21.
- **Adverse birth events**: A composite of birth trauma and mechanical injuries sustained during delivery, primarily identified by ICD-10 codes P10–P15 (e.g., intracranial laceration, skeletal injuries, or nerve damage due to birth trauma).

**Neonatal Clinical Factors**

- **Low birth weight (LBW) or preterm birth**: ICD-10 code P07.
- **Bacterial sepsis**: Neonatal sepsis, ICD-10 code P36.
- **Necrotizing enterocolitis (NEC)**: ICD-10 code P77.
- **Fetal malnutrition**: ICD-10 code P05.
- **Mechanical ventilation**: Identified by procedure codes for ventilator support during the NICU stay.
- **Congenital circulatory malformations**: ICD-10 codes Q20–Q24.
- **Congenital gastrointestinal (GI) malformations**: ICD-10 codes Q38–Q45.
- **Bilirubin metabolism disorders**: ICD-10 code E80.
- **Lipoprotein metabolism disorders**: ICD-10 code E78.
- **Other metabolic disorders**: Includes various disturbances not otherwise specified, ICD-10 code E88.

**Pediatric Complex Chronic Conditions (CCC)** The baseline health status of the child was further characterized using Pediatric Complex Chronic Condition categories (Version 2) based on the following ICD-10 codes 1:

- **Neuromuscular**: Conditions affecting the central or peripheral nervous system (G10–G13, G20–G26, G30–G32, G35–G37, G40–G41, G70–G73, G80–G83, F70–F79, Q00–Q07).
- **Cardiovascular**: Congenital or acquired disorders of the heart (I00–I02, I05–I09, I11, I20–I25, I26–I28, I30–I52, Q20–Q28).
- **Respiratory**: Chronic conditions of the lungs and airways (J40–J47, J60–J70, J95–J99, Q30–Q34).
- **Gastrointestinal**: Severe disorders of the digestive tract requiring specialized management (K20–K31, K50–K52, K70–K77, K80–K87, Q38–Q45).
- **Renal**: Chronic diseases of the kidneys and urinary tract (N00–N08, N10–N16, N17–N19, Q60–Q64).
- **Metabolic**: Inborn errors of metabolism and endocrine disorders (E00–E07, E10–E14, E70–E88, Q86–Q89).
- **Hematologic**: Diseases of the blood and blood-forming organs (D50–D53, D55–D59, D60–D64, D65–D69, D70–D77, D80–D89).
- **Congenital/Genetic**: Chromosomal abnormalities and malformations not organ-specific (Q10–Q18, Q65–Q79, Q80–Q85, Q90–Q99).

Reference)

1. Feinstein JA, Hall M, Davidson A, Feudtner C. Pediatric Complex Chronic Condition System Version 3. JAMA Netw Open 2024;7(7):e2420579. DOI: 10.1001/jamanetworkopen.2024.20579.
