# Supplementary material
Source: Research Square preprint supplement (doi:10.21203/rs.3.rs-9944383/v1)
Supplement: Supplementary file 4 [file 496ff270738dc2d212b796f3.docx]

Table 1. Baseline Characteristics Before and After Entropy Balancing

| Variable | | TPN group  n= 6,147 | Control group  n= 2,263,854 | Weighted control group  n= 9,550 | SMD  (before) | SMD  (After) |
| --- | --- | --- | --- | --- | --- | --- |
| Mother age, y, mean (SD) | | 32.7 (4.2) | 31.7 (4.2) | 32.7 (4.2) | 0.242 | <0.001 |
| Household income level, n (%) | |  |  |  |  |  |
|  | Medical aid program | 200 (3.3) | 64,293 (2.8) | 310 (3.3) | 0.004 | <0.001 |
|  | Q1 (lowest) | 664 (10.8) | 248,118 (11.0) | 1,031 (10.8) | -0.002 | <0.001 |
|  | Q2 | 1,396 (22.7) | 554,191 (24.5) | 2,168 (22.7) | -0.018 | <0.001 |
|  | Q3 | 2,338 (38.0) | 856,190 (37.8) | 3,632 (38.0) | 0.002 | <0.001 |
|  | Q4 (highest) | 1,482 (24.1) | 529,515 (23.4) | 2,303 (24.1) | 0.007 | <0.001 |
|  | Unknown | 67 (1.1) | 11,772 (0.5) | 104 (1.1) | 0.006 | <0.001 |
| Residence, n (%) | |  |  |  |  |  |
|  | Metropolitan area | 1,653 (26.9) | 591,092 (26.1) | 2,568 (26.9) |  |  |
|  | Non-metropolitan area | 4,494 (73.1) | 1,672,762 (73.9) | 6,982 (73.1) | -0.008 | <0.001 |
| Maternal History, n (%) | |  |  |  |  |  |
|  | Psychotic disorders | 18 (0.3) | 6,792 (0.3) | 28 (0.3) | 0.000 | <0.001 |
|  | Bipolar disorders | 18 (0.3) | 6,792 (0.3) | 28 (0.3) | 0.000 | <0.001 |
|  | Depressive disorders | 341 (5.6) | 113,872 (5.0) | 530 (5.6) | 0.005 | <0.001 |
|  | Chronic hypertension | 653 (10.6) | 71,763 (3.2) | 1,014 (10.6) | 0.075 | <0.001 |
|  | Pre-gestational diabetes mellitus | 523 (8.5) | 120,211 (5.3) | 813 (8.5) | 0.032 | <0.001 |
|  | Neuropsychiatric conditions | 13 (0.2) | 1,132 (0.1) | 20 (0.2) | 0.002 | <0.001 |
| Pregnancy/Birth, n (%) | |  |  |  |  |  |
|  | Hypertensive disorders of pregnancy | 1,074 (17.5) | 119,305 (5.3) | 1,668 (17.5) | 0.122 | <0.001 |
|  | Pre-eclampsia or eclampsia | 865 (14.1) | 37,127 (1.6) | 1,344 (14.1) | 0.124 | <0.001 |
|  | Gestational diabetes mellitus | 998 (16.2) | 281,171 (12.4) | 1,551 (16.2) | 0.038 | <0.001 |
|  | Cesarean delivery | 2,991 (48.7) | 764,956 (33.8) | 4,647 (48.7) | 0.149 | <0.001 |
|  | Birth asphyxia | 516 (8.4) | 8,150 (0.4) | 801 (8.4) | 0.080 | <0.001 |
|  | Adverse birth events | 1,427 (23.2) | 42,108 (1.9) | 2,217 (23.2) | 0.214 | <0.001 |
| Neonatal factors, n (%) | |  |  |  |  |  |
|  | Female sex | 2,830 (46.0) | 1,100,459 (48.6) | 4,397 (46.0) | -0.026 | <0.001 |
|  | Low birth weight or preterm | 4,520 (73.5) | 49,578 (2.2) | 7,021 (73.5) | 0.713 | <0.001 |
|  | Bacterial sepsis | 2,759 (44.9) | 55,012 (2.4) | 4,286 (44.9) | 0.425 | <0.001 |
|  | Necrotizing enterocolitis | 487 (7.9) | 1,585 (0.1) | 756 (7.9) | 0.079 | <0.001 |
|  | Fetal malnutrition | 412 (6.7) | 7,018 (0.3) | 640 (6.7) | 0.064 | <0.001 |
|  | Mechanical ventilation during NICU stay | 3,898 (63.4) | 19,469 (0.9) | 6,056 (63.4) | 0.626 | <0.001 |
|  | Congenital circulatory malformations | 1,411 (23.0) | 42,560 (1.9) | 2,192 (23.0) | 0.211 | <0.001 |
|  | Congenital GI malformations | 832 (13.5) | 47,994 (2.1) | 1,291 (13.5) | 0.114 | <0.001 |
|  | Disorders of bilirubin metabolism | 87 (1.4) | 3,169 (0.1) | 136 (1.4) | 0.013 | <0.001 |
|  | Lipoprotein metabolism disorders | 97 (1.6) | 8,376 (0.4) | 151 (1.6) | 0.012 | <0.001 |
|  | Other metabolic disorders | 174 (2.8) | 2,490 (0.1) | 270 (2.8) | 0.027 | <0.001 |
| Pediatric CCC, n (%) | |  |  |  |  |  |
|  | 0 | 3,298 (53.7) | 1,852,964 (81.9) | 5,124 (53.7) | -0.282 | <0.001 |
|  | 1 | 2,153 (35.0) | 402,966 (17.8) | 3,345 (35.0) | 0.172 | <0.001 |
|  | ≥ 2 | 696 (11.3) | 7,697 (0.3) | 1,081 (11.3) | 0.110 | <0.001 |
| Year of baby birth, n (%) | |  |  |  |  |  |
|  | 2005 | 458 (7.4) | 348,407 (15.4) | 712 (7.4) | -0.080 | <0.001 |
|  | 2006 | 750 (12.2) | 364,707 (16.1) | 1,165 (12.2) | -0.039 | <0.001 |
|  | 2007 | 947 (15.4) | 403,419 (17.8) | 1,472 (15.4) | -0.024 | <0.001 |
|  | 2008 | 1,151 (18.7) | 381,912 (16.9) | 1,788 (18.7) | 0.019 | <0.001 |
|  | 2009 | 1,240 (20.2) | 367,424 (16.2) | 1,926 (20.2) | 0.039 | <0.001 |
|  | 2010 | 1,601 (26.1) | 397,986 (17.6) | 2,493 (26.1) | 0.085 | <0.001 |

CCC, complex chronic conditions; GI, gastrointestinal; NICU, neonatal intensive care unit; SD, standard deviation; SMD, standardized mean difference; TPN, total parenteral nutrition.
