# Supplementary material
Source: Research Square preprint supplement (doi:10.21203/rs.3.rs-9944383/v1)
Supplement: Supplementary file 5 [file 8c6e98b5ae981d3950b90659.docx]

Table 4. Subgroup analyses

| Outcome | | Multivariable analyses | *P*-value |
| --- | --- | --- | --- |
| HR (95% CI) |
| Infants requiring mechanical ventilation support (n = 23,382) | |  |  |
|  | TPN group (vs control group) | 1.21 (1.10, 1.33) | <0.001 |
|  | TPN, day | 1.13 (1.07, 1.19) | <0.001 |
|  | TPN 1-2 days (vs control group) | 1.20 (1.09, 1.33) | <0.001 |
|  | TPN ≥ 3 days (vs control group) | 1.41 (1.02, 1.95) | 0.037 |
| Infants with LBW or fetal growth restriction (n = 58,556) | |  |  |
|  | TPN group (vs control group) | 1.19 (1.09, 1.31) | <0.001 |
|  | TPN, day | 1.14 (1.08, 1.21) | <0.001 |
|  | TPN 1-2 days (vs control group) | 1.18 (1.08, 1.30) | <0.001 |
|  | TPN ≥ 3 days (vs control group) | 1.45 (1.05, 2.09) | 0.024 |
| Infants admitted to the neonatal NICU (n = 42,007) | |  |  |
|  | TPN group (vs control group) | 1.13 (1.04, 1.23) | 0.005 |
|  | TPN, day | 1.11 (1.05, 1.17) | <0.001 |
|  | TPN 1-2 days (vs control group) | 1.12 (1.02, 1.22) | 0.013 |
|  | TPN ≥ 3 days (vs control group) | 1.50 (1.08, 2.08) | 0.015 |

HR, hazard ratio; CI, confidence interval; TPN, Total Parenteral Nutrition; NICU, neonatal intensive care unit
