# Supplementary material
Source: Research Square preprint supplement (doi:10.21203/rs.3.rs-9944383/v1)
Supplement: Supplementary file 6 [file f8db0432f94b7dc68a89fcc0.docx]

Table 2. Weighted HRs for Neurodevelopmental Disorders After Entropy Balancing

| Outcome | | HR (95% CI) | *P*-value |
| --- | --- | --- | --- |
| Total NDD | |  |  |
|  | Control group | 1 |  |
|  | TPN group | 1.16 (1.06, 1.27) | 0.002 |
| Intellectual disability | |  |  |
|  | Control group | 1 |  |
|  | TPN group | 1.32 (1.07, 1.63) | 0.008 |
| Psychological development disorder | |  |  |
|  | Control group | 1 |  |
|  | TPN group | 1.17 (1.02, 1.35) | 0.026 |
| Behavioral and emotional disorders | |  |  |
|  | Control group | 1 |  |
|  | TPN group | 1.13 (1.01, 1.26) | 0.040 |
| Attention-deficit/hyperactivity disorder | |  |  |
|  | Control group | 1 |  |
|  | TPN group | 1.16 (1.03, 1.32) | 0.017 |
| Autism Spectrum Disorder | |  |  |
|  | Control group | 1 |  |
|  | TPN group | 1.02 (0.79, 1.31) | 0.875 |
| Tic disorder | |  |  |
|  | Control group | 1 |  |
|  | TPN group | 1.03 (0.82, 1.30) | 0.791 |
| Mood disorder | |  |  |
|  | Control group | 1 |  |
|  | TPN group | 1.07 (0.94, 1.22) | 0.302 |
| Neurotic, stress-related and somatoform disorders | |  |  |
|  | Control group | 1 |  |
|  | TPN group | 1.05 (0.95, 1.17) | 0.350 |

HRs were estimated using entropy balancing to adjust for all covariates listed in Table 1

NDD, neurodevelopmental disorder; HR. hazard ratio; CI, confidence interval; TPN, total parenteral nutrition
